# Supplementary material for: A comparative study on predicting influenza outbreaks using different feature spaces: application of influenza-like illness data from Early Warning Alert and Response System in Syria
Source: BMC Res Notes. 2020 Jan 16;13:33. doi: 10.1186/s13104-020-4889-5 (PMC6964210; doi:10.1186/s13104-020-4889-5)
Supplement: Supplementary file 2 — Additional file 2. Dataset used in manuscript. .csv file contains the EWARS data about ILI in SYRIA from the first week of 2014 to the the 42nd week of 2018. [file 13104_2020_4889_MOESM2_ESM.csv]

YY	WEEKNO	TOTAL	TOTALPATIENT	RATE
2014	1	1722	3600	0.47833
2014	2	4931	8231	0.59908
2014	3	4403	7885	0.5584
2014	4	4482	8058	0.55622
2014	5	4727	8556	0.55248
2014	6	5312	9902	0.53646
2014	7	5804	10451	0.55535
2014	8	5747	10412	0.55196
2014	9	5930	10748	0.55173
2014	10	6905	12719	0.54289
2014	11	4259	8175	0.52098
2014	12	3423	6724	0.50907
2014	13	5336	11561	0.46155
2014	14	4795	9222	0.51995
2014	15	4719	9865	0.47836
2014	16	4434	10097	0.43914
2014	17	4332	10402	0.41646
2014	18	3960	9401	0.42123
2014	19	3702	9026	0.41015
2014	20	3690	10014	0.36848
2014	21	4217	11542	0.36536
2014	22	4119	11066	0.37222
2014	23	2772	7734	0.35842
2014	24	2498	9362	0.26682
2014	25	3543	11532	0.30723
2014	26	3410	11040	0.30888
2014	27	2907	10158	0.28618
2014	28	3089	11144	0.27719
2014	29	3171	11382	0.2786
2014	30	3002	9693	0.30971
2014	31	928	3530	0.26289
2014	32	3578	11006	0.3251
2014	33	3372	11107	0.30359
2014	34	3704	11735	0.31564
2014	35	4118	12278	0.3354
2014	36	4594	13535	0.33942
2014	37	4421	12401	0.3565
2014	38	5283	14308	0.36923
2014	39	5555	14010	0.3965
2014	40	5574	12556	0.44393
2014	41	2517	5747	0.43797
2014	42	7634	16631	0.45902
2014	43	9049	18894	0.47894
2014	44	8526	17858	0.47743
2014	45	8385	17727	0.47301
2014	46	9847	20206	0.48733
2014	47	10042	20101	0.49958
2014	48	7518	19872	0.37832
2014	49	10970	21303	0.51495
2014	50	9780	19733	0.49562
2014	51	10508	20305	0.51751
2014	52	8716	16655	0.52333
2015	1	8397	15269	0.54994
2015	2	5123	10189	0.5028
2015	3	6492	12873	0.50431
2015	4	9245	16921	0.54636
2015	5	9291	17609	0.52763
2015	6	8274	16495	0.50161
2015	7	8922	16758	0.5324
2015	8	9280	16749	0.55406
2015	9	9443	16657	0.56691
2015	10	9888	17766	0.55657
2015	11	9727	18166	0.53545
2015	12	10237	18442	0.55509
2015	13	9272	16147	0.57422
2015	14	9233	16123	0.57266
2015	15	9222	16910	0.54536
2015	16	9245	17017	0.54328
2015	17	10677	19122	0.55836
2015	18	10378	18863	0.55018
2015	19	8486	16827	0.50431
2015	20	7209	14794	0.48729
2015	21	7868	17022	0.46223
2015	22	5611	13450	0.41717
2015	23	7183	16330	0.43987
2015	24	5498	17073	0.32203
2015	25	6105	16421	0.37178
2015	26	6035	15284	0.39486
2015	27	6846	17038	0.40181
2015	28	6661	17453	0.38165
2015	29	5927	16743	0.354
2015	30	5965	17326	0.34428
2015	31	7307	20208	0.36159
2015	32	7002	20187	0.34686
2015	33	7049	18877	0.37342
2015	34	7869	21668	0.36316
2015	35	7914	20648	0.38328
2015	36	8575	20054	0.4276
2015	37	8959	20397	0.43923
2015	38	8682	20828	0.41684
2015	39	8025	18363	0.43702
2015	40	8776	19945	0.44001
2015	41	9512	20551	0.46285
2015	42	7666	16598	0.46186
2015	43	12759	24199	0.52725
2015	44	11126	21763	0.51123
2015	45	12948	23372	0.554
2015	46	12507	22586	0.55375
2015	47	12741	22588	0.56406
2015	48	12495	22269	0.56109
2015	49	13414	24034	0.55813
2015	50	12696	22762	0.55777
2015	51	13674	23364	0.58526
2015	52	13143	21809	0.60264
2016	1	14763	24465	0.60343
2016	2	16786	28779	0.58327
2016	3	19448	30293	0.642
2016	4	20666	31697	0.65199
2016	5	17054	27165	0.62779
2016	6	20210	30858	0.65494
2016	7	19292	29990	0.64328
2016	8	19103	30142	0.63377
2016	9	16267	27171	0.59869
2016	10	16341	26922	0.60698
2016	11	14740	25390	0.58054
2016	12	14669	24753	0.59262
2016	13	11434	19723	0.57973
2016	14	11888	20379	0.58335
2016	15	12015	21025	0.57146
2016	16	11558	20404	0.56646
2016	17	11338	20208	0.56106
2016	18	11710	21569	0.54291
2016	19	9523	18296	0.5205
2016	20	10030	20407	0.4915
2016	21	10266	20570	0.49908
2016	22	9048	19184	0.47164
2016	23	8380	18035	0.46465
2016	24	7043	16824	0.41863
2016	25	6771	18009	0.37598
2016	26	6616	17839	0.37087
2016	27	6249	16238	0.38484
2016	28	4324	12876	0.33582
2016	29	6241	16753	0.37253
2016	30	7462	19036	0.39199
2016	31	8145	19664	0.41421
2016	32	7002	17070	0.41019
2016	33	8117	18255	0.44465
2016	34	8367	18563	0.45074
2016	35	8283	19288	0.42944
2016	36	8070	17642	0.45743
2016	37	6187	12516	0.49433
2016	38	4456	9728	0.45806
2016	39	9603	18334	0.52378
2016	40	10654	19781	0.5386
2016	41	9603	18503	0.519
2016	42	10818	19733	0.54822
2016	43	13944	23971	0.5817
2016	44	12658	22096	0.57286
2016	45	12268	21682	0.56581
2016	46	13792	22762	0.60592
2016	47	14917	24041	0.62048
2016	48	15103	22848	0.66102
2016	49	14242	23100	0.61654
2016	50	17193	26622	0.64582
2016	51	16564	24654	0.67186
2016	52	16108	24405	0.66003
2017	1	16763	25495	0.6575
2017	2	16675	25419	0.65601
2017	3	17458	26765	0.65227
2017	4	16988	25687	0.66135
2017	5	13390	21671	0.61788
2017	6	15112	24671	0.61254
2017	7	15173	24405	0.62172
2017	8	15802	24797	0.63725
2017	9	13931	22689	0.614
2017	10	12161	20911	0.58156
2017	11	15063	24701	0.60981
2017	12	12307	20663	0.59561
2017	13	13133	21824	0.60177
2017	14	11533	19475	0.5922
2017	15	11092	19400	0.57175
2017	16	10217	18530	0.55138
2017	17	10881	19410	0.56059
2017	18	8406	14955	0.56209
2017	19	9112	17782	0.51243
2017	20	9171	18502	0.49568
2017	21	9990	20071	0.49773
2017	22	7670	16712	0.45895
2017	23	7219	17213	0.41939
2017	24	6526	16223	0.40227
2017	25	5607	13620	0.41167
2017	26	2877	8829	0.32586
2017	27	6791	17170	0.39552
2017	28	7160	18273	0.39183
2017	29	6956	18148	0.38329
2017	30	7450	18997	0.39217
2017	31	7346	18115	0.40552
2017	32	7363	18266	0.4031
2017	33	7476	18476	0.40463
2017	34	7710	17690	0.43584
2017	35	6510	14541	0.4477
2017	36	5919	13291	0.44534
2017	37	8459	16523	0.51195
2017	38	9150	16792	0.5449
2017	39	11358	19147	0.5932
2017	40	11462	19147	0.59863
2017	41	12866	20987	0.61305
2017	42	13364	22110	0.60443
2017	43	12662	21000	0.60295
2017	44	12704	20917	0.60735
2017	45	12783	20548	0.6221
2017	46	12982	21939	0.59173
2017	47	13111	22644	0.57901
2017	48	11988	20026	0.59862
2017	49	13129	21436	0.61247
2017	50	13268	20365	0.65151
2017	51	13498	21249	0.63523
2017	52	10476	16929	0.61882
2018	1	10211	17149	0.59543
2018	2	13562	21837	0.62106
2018	3	13569	21897	0.61967
2018	4	12890	20624	0.625
2018	5	13955	22677	0.61538
2018	6	17512	26141	0.66991
2018	7	18629	28390	0.65618
2018	8	17209	25638	0.67123
2018	9	16433	24583	0.66847
2018	10	15931	23550	0.67648
2018	11	15994	25099	0.63724
2018	12	12043	21651	0.55623
2018	13	13719	25339	0.54142
2018	14	11961	22727	0.52629
2018	15	11524	21167	0.54443
2018	16	12145	24743	0.49085
2018	17	15065	27040	0.55714
2018	18	11779	24636	0.47812
2018	19	12281	26034	0.47173
2018	20	12426	25349	0.4902
2018	21	10969	23333	0.47011
2018	22	10977	24300	0.45173
2018	23	10449	23374	0.44704
2018	24	8606	18238	0.47187
2018	25	9406	22137	0.4249
2018	26	10580	24984	0.42347
2018	27	10580	24985	0.42345
2018	28	10487	23445	0.4473
2018	29	11211	26216	0.42764
2018	30	11200	25555	0.43827
2018	31	11130	25157	0.44242
2018	32	10851	24456	0.44369
2018	33	9427	20575	0.45818
2018	34	5821	14472	0.40222
2018	35	13837	26773	0.51683
2018	36	11892	25528	0.46584
2018	37	12722	24489	0.5195
2018	38	13678	25236	0.542
2018	39	14868	27568	0.53932
2018	40	14400	26412	0.54521
2018	41	17224	29309	0.58767
2018	42	16027	26916	0.59545
